# Supplementary material for: TIMSS Science Achievement Profiles and Their Associations with Motivation, Instructional Quality Scales
Source: Research Square preprint supplement (doi:10.21203/rs.3.rs-6984158/v1), 2025-07-22
Supplement: Supplementary file 1 [file d0bb8fcccdb339c841d1256f.docx]

**Supplementary Files**

**Table 1**

*The variables and categories used for covariate analysis*

| **Variables** | **Categories** |
| --- | --- |
| Gender (ASBG01) | 1. Female 2. **Male*** |
| Language (ASBG03) | 1. **I always speak language*** 2. I almost speak language 3. I sometimes speak language 4. I never speak language |
| Home Resource Learning/IDX (ASDGHRL) | 1. **Many Resource** 2. Some Resources* 3. Few Resources* |
| Classroom management/IDX (Klassenf_SCIK) | 1. Low 2. Medium 3. **High*** |
| Cognitive activation/IDX (Kognitive_SCIK) | 1. Low 2. Medium 3. **High*** |
| Constructive support /IDX(Konstruktive Unterstützung) | 1. Low 2. Medium 3. **High*** |
| Students Like Learning Science/IDX (ASDGSLS) | 1. **Very Much Like Learning Science*** 2. Somewhat Like Learning Science 3. Do Not Like Learning Science |
| Students Confident in Science/IDX (ASDGSCS) | 1. **Very Confident in Science*** 2. Somewhat Confident in Science 3. Not Confident in Science |

**Categories marked in black and bold were used as reference categories.*

**Table 2**

*Descriptive Statistics of variables and categories used for covariate analysis with missing values*

|  |  | Frequency | Weighted  Frequency | Std Err of  Wgt Freq | Percent | Std Err of Percent |
| --- | --- | --- | --- | --- | --- | --- |
| Gender | **1** | 1503 | 311347 | 6081 | 50.5529 | 0.9519 |
| Missing values = 456 | **2** | 1478 | 304536 | 6072 | 49.4471 | 0.9519 |
| **Total** | 2981 | 615883 | 3196 | 100.0000 |  |
| Language  Missing values = 497 | **1** | 1819 | 377857 | 6051 | 62.2003 | 0.9268 |
| **2** | 502 | 104306 | 4424 | 17.1702 | 0.7228 |
| **3** | 549 | 110842 | 4453 | 18.2462 | 0.7318 |
| **4** | 70 | 14478 | 1765 | 2.3833 | 0.2904 |
| **Total** | 2940 | 607483 | 3179 | 100.0000 |  |
| Home Resource Learning/IDX (ASDGHRL)  Missing values = 1383 | **1** | 563 | 115889 | 4405 | 27.1250 | 1.0193 |
| **2** | 1463 | 305642 | 4872 | 71.5385 | 1.0344 |
| **3** | 28 | 5710 | 1116 | 1.3364 | 0.2612 |
| **Total** | 2054 | 427242 | 2745 | 100.0000 |  |
| Classroom management/IDX (Klassenf_SCIK) Missing values = 782 | **1** | 637 | 130668 | 4758 | 23.7501 | 0.8565 |
| **2** | 739 | 151611 | 5008 | 27.5567 | 0.8995 |
| **3** | 1279 | 267899 | 5764 | 48.6932 | 1.0080 |
| **Total** | 2655 | 550178 | 3004 | 100.0000 |  |
| Cognitive activation/IDX (Kognitive_SCIK)  Missing values = 880 | **1** | 133 | 27022 | 2373 | 5.0957 | 0.4471 |
| **2** | 975 | 202835 | 5418 | 38.2494 | 0.9985 |
| **3** | 1449 | 300439 | 5652 | 56.6549 | 1.0177 |
| **Total** | 2557 | 530297 | 2933 | 100.0000 |  |
| Constructive support /IDX(Konstruktive Unterstützung)  Missing values = 847 | **1** | 136 | 29455 | 2560 | 5.4800 | 0.4742 |
| **2** | 544 | 110903 | 4450 | 20.6327 | 0.8225 |
| **3** | 1910 | 397152 | 5295 | 73.8873 | 0.8967 |
| **Total** | 2590 | 537510 | 2968 | 100.0000 |  |
| Students Like Learning Science/IDX (ASDGSLS)  Missing values = 525 | **1** | 1338 | 282414 | 6090 | 46.9413 | 0.9625 |
| **2** | 1128 | 231160 | 5729 | 38.4222 | 0.9354 |
| **3** | 446 | 88058 | 3994 | 14.6365 | 0.6657 |
| **Total** | 2912 | 601631 | 3152 | 100.0000 |  |
| Students Confident in Science/IDX (ASDGSCS)  Missing values = 574 | **1** | 1129 | 234966 | 5796 | 39.6591 | 0.9513 |
| **2** | 1248 | 258542 | 5877 | 43.6384 | 0.9635 |
| **3** | 486 | 98956 | 4272 | 16.7025 | 0.7186 |
| **Total** | 2863 | 592465 | 3129 | 100.0000 |  |

**Table 3**

*Descriptive Statistics of variables and categories used for covariate analysis after multiple imputation**

|  |  | Frequency | Weighted  Frequency | Std Err of  Wgt Freq | Percent | Std Err of Percent |
| --- | --- | --- | --- | --- | --- | --- |
| Gender | **1** | 1739 | 359234 | 6514 | 50.6700 | 0.8864 |
|  | **2** | 1698 | 349734 | 6511 | 49.3300 | 0.8864 |
|  | **Total** | 3437 | 708968 | 3420 | 100.0000 |  |
| Language | **1** | 2118 | 440039 | 6542 | 62.0676 | 0.8571 |
| **2** | 590 | 121628 | 4757 | 17.1557 | 0.6667 |
| **3** | 638 | 128809 | 4804 | 18.1685 | 0.6762 |
| **4** | 91 | 18492 | 1969 | 2.6083 | 0.2777 |
| **Total** | 3437 | 708968 | 3420 | 100.0000 |  |
| Home Resource Learning/IDX (ASDGHRL) | **1** | 809 | 165655 | 5373 | 23.3656 | 0.7498 |
| **2** | 2572 | 531905 | 6022 | 75.0252 | 0.7669 |
| **3** | 56 | 11409 | 1576 | 1.6092 | 0.2221 |
| **Total** | 3437 | 708968 | 3420 | 100.0000 |  |
| Classroom management/IDX (Klassenf_SCIK) | **1** | 922 | 188789 | 5619 | 26.6287 | 0.7829 |
| **2** | 885 | 181532 | 5544 | 25.6051 | 0.7730 |
| **3** | 1630 | 338647 | 6506 | 47.7662 | 0.8857 |
| **Total** | 3437 | 708968 | 3420 | 100.0000 |  |
| Cognitive activation/IDX (Kognitive_SCIK) | **1** | 273 | 54710 | 3309 | 7.7168 | 0.4665 |
| **2** | 1186 | 244985 | 6091 | 34.5552 | 0.8430 |
| **3** | 1978 | 409273 | 6545 | 57.7280 | 0.8751 |
| **Total** | 3437 | 708968 | 3420 | 100.0000 |  |
| Constructive support /IDX(Konstruktive Unterstützung) | **1** | 300 | 61798 | 3567 | 8.7166 | 0.5011 |
| **2** | 639 | 129730 | 4861 | 18.2984 | 0.6820 |
| **3** | 2498 | 517441 | 6140 | 72.9850 | 0.7854 |
| **Total** | 3437 | 708968 | 3420 | 100.0000 |  |
| Students Like Learning Science/IDX (ASDGSLS) | **1** | 1476 | 311177 | 6542 | 43.8916 | 0.8820 |
| **2** | 1316 | 269915 | 6219 | 38.0715 | 0.8601 |
| **3** | 645 | 127876 | 4730 | 18.0369 | 0.6688 |
| **Total** | 3437 | 708968 | 3420 | 100.0000 |  |
| Students Confident in Science/IDX (ASDGSCS) | **1** | 1268 | 262740 | 6227 | 37.0595 | 0.8572 |
| **2** | 1487 | 308269 | 6440 | 43.4813 | 0.8795 |
| **3** | 682 | 137960 | 4944 | 19.4592 | 0.6952 |
| **Total** | 3437 | 708968 | 3420 | 100.0000 |  |

* *Only the results of imputation 1 were provided here, but other results are available upon request.*

**Table 4**

*The Latent profiles with covariate variables when reference profile was profile 1*

|  | **Profil 2 vs. 1** | | **Profil 3 vs. 1** | | **Profil 4 vs. 1** | | |
| --- | --- | --- | --- | --- | --- | --- | --- |
| **Covariates** |  |  |  |  |  |  |
| Students Like Learning Science | -0.410* | **0.664** | -0.368* | **0.692** | 0.003 | 1.003 |
| Students Confident in Science | -0.571* | **0.565** | -1.084** | **0.338** | -1.873** | **0.154** |
| Gender | 0.041 | 1.041 | -0.096 | 0.908 | -0.245 | 0.782 |
| Language | -0.585** | **0.557** | -1.067** | **0.344** | -1.308** | **0.270** |
| Home Resource Learning | -1.168** | **0.311** | -2.086** | **0.124** | -2.951** | **0.052** |
| Cognitive Activation | 0.407* | **1.503** | 0.524** | **1.689** | 0.799** | **2.223** |
| Classroom Management | -0.332* | **0.718** | -0.504** | **0.604** | -0.599** | **0.550** |
| Constructive Support | 0.045 | 1.046 | -0.121 | 0.886 | -0.372 | 0.689 |

**Table 5**

*The Latent profiles with covariate variables when reference profile was profile 2*

|  | **Profil 1 vs. 2** | | **Profil 3 vs. 2** | | **Profil 4 vs. 2** | | |
| --- | --- | --- | --- | --- | --- | --- | --- |
| **Covariates** |  |  |  |  |  |  |
| Students Like Learning Science | 0.410* | **1.507** | 0.042 | 1.043 | 0.413* | **1.511** |
| Students Confident in Science | 0.571* | **1.770** | -0.514** | **0.598** | -1.302** | **0.272** |
| Gender | -0.041 | 0.960 | -0.137 | 0.872 | -0.286* | **0.751** |
| Language | 0.585** | **1.795** | -0.482** | **0.617** | -0.723** | **0.485** |
| Home Resource Learning | 1.168** | **3.217** | -0.918** | **0.399** | -1.782** | **0.168** |
| Cognitive Activation | -0.407* | **0.665** | 0.117 | 1.124 | 0.391** | **1.479** |
| Classroom Management | 0.332* | **1.394** | -0.172 | 0.842 | -0.267 | 0.766 |
| Constructive Support | -0.045 | 0.956 | -0.166 | 0.847 | -0.418* | **0.659** |

**Table 6**

*The Latent profiles with covariate variables when reference profile was profile 3*

|  | **Profil 1 vs. 3** | | **Profil 2 vs. 3** | | **Profil 4 vs. 3** | | |
| --- | --- | --- | --- | --- | --- | --- | --- |
| **Covariates** |  |  |  |  |  |  |
| Students Like Learning Science | 0.368* | **1.445** | -0.042 | 0.959 | 0.371* | **1.448** |
| Students Confident in Science | 1.084** | **2.958** | 0.514** | **1.672** | -0.789** | **0.455** |
| Gender | 0.096 | 1.101 | 0.137 | 1.147 | -0.149 | 0.862 |
| Language | 1.067** | **2.907** | 0.482** | **1.620** | -0.240 | 0.786 |
| Home Resource Learning | 2.086** | **8.055** | 0.918** | **2.504** | -0.865** | **0.421** |
| Cognitive Activation | -0.524** | **0.592** | -0.117 | 0.890 | 0.275 | 1.316 |
| Classroom Management | 0.504** | **1.656** | 0.172 | 1.188 | -0.094 | 0.910 |
| Constructive Support | 0.121 | 1.128 | 0.166 | 1.180 | -0.252 | 0.777 |
